# Supplementary material
Source: MDPI journal article supplement (https://www.mdpi.com/2071-1050/13/5/2442)
Supplement: s1 [file s1]

## Karst nature reserves

**Baimianshui:** Baimianshui nature reserve is located in Meitan County, with a total area of 19,173 hm<sup>2</sup>, and is facing ecological degradation like vegetation reduction, biodiversity loss, soil erosion, environmental pollution, and karst rocky desertification. The karst type of Baimianshui nature reserve is limestone karst. There are three main types of protected objects in the Baimianshui nature reserve: 1) mid-subtropical karst forest ecosystems; 2) rare and endangered plants and their habitats under national protection, represented by *Pseudotsuga sinensis*, *Taxus wallichiana* var. *chinensis*, *Taxus wallichiana* var. *mairei*, etc. 3) rare and endangered wild animals and their habitats under national protection, represented by *Moschus berezovskii*, *Macaca mulatta*, etc.

**Kuankuoshui:** Kuankuoshui nature reserve is located in Suiyang County, with a total area of 26,231 hm<sup>2</sup>, and is facing ecological degradation like biodiversity loss, vegetation reduction, soil erosion, environmental pollution, and karst rocky desertification. The karst type of Kuankuoshui nature reserve is limestone karst. There are three main types of protected objects in the Kuankuoshui nature reserve: 1) mid-subtropical evergreen and deciduous broad-leaved mixed forest; 2) rare and endangered plants and their habitats under national protection, represented by *Davidia involucrata*, *Taxus wallichiana* var. *chinensis*, *Taxus wallichiana* var. *mairei*, *Emmenopterys henryi*, etc. 3) rare and endangered wild animals and their habitats under national protection, represented by *Trachypithecus francoisi*, *Chrysolophus pictus*, *Tragopan temminckii*, *Syrmaticus reevesii*, etc.

**Dashahe:** Dashahe nature reserve is located in Daozhen County, with a total area of 26,990 hm<sup>2</sup>, and is facing ecological degradation like biodiversity loss, soil erosion, vegetation reduction, environmental pollution, and karst rocky desertification. The karst type of Dashahe nature reserve is limestone karst. There are three main types of protected objects in the Dashahe nature reserve: 1) rare and endangered plants and their habitats under national protection, represented by *Cathaya argyrophylla*; 3) rare and endangered wild animals and their habitats under national protection, represented by *Trachypithecus francoisi*.

**Maolan:** Maolan nature reserve is located in Libo County, with a total area of 21,285 hm<sup>2</sup>, and is facing ecological degradation like biodiversity loss, soil erosion, vegetation reduction, environmental pollution, and karst rocky desertification. The karst type of Maolan nature reserve is dolomite karst. There are three main types of protected objects in the Maolan nature reserve: 1) mid-subtropical karst forest ecosystems; 2) rare and endangered plants and their habitats under national protection, represented by *Mussaenda anomala*, *Taxus wallichiana* var. *chinensis*, *Taxus wallichiana* var. *mairei*, *Kmeria septentrionalis*, etc. 3) rare and endangered wild animals and their habitats under national protection, represented by *Panthera pardus*, *Syrmaticus ellioti*, etc.

**Fodingshan:** Fodingshan nature reserve is located in Shiqian County, with a total area of 15,200 hm<sup>2</sup>, and is facing ecological degradation like vegetation reduction, biodiversity loss, soil erosion, environmental pollution, and karst rocky desertification.

The karst type of Fodingshan nature reserve is limestone karst. There are three main types of protected objects in the Fodingshan nature reserve: 1) mid-subtropical evergreen broad-leaf forest; 2) rare and endangered plants and their habitats under national protection, represented by *Keteleeria pubescens*, *Amentotaxus argotaenia*, *Dipteronia sinensis*, *Dysosma versipellis*, etc. 3) rare and endangered wild animals and their habitats under national protection, represented by *Panthera pardus*, *Moschus berezovskii*, *Macaca mulatta*, *Manis pentadactyla*, etc.

**Siyetun:** Siyetun nature reserve is located in Sinan County, with a total area of 17,400 hm<sup>2</sup>, and is facing ecological degradation like vegetation reduction, biodiversity loss, soil erosion, environmental pollution, and karst rocky desertification. The karst type of Siyetun nature reserve is limestone karst. There are three main types of protected objects in the Siyetun nature reserve: 1) mid-subtropical evergreen broad-leaf forest and evergreen and deciduous broad-leaved mixed forest; 2) rare and endangered plants and their habitats under national protection, represented by *Taxus chinensis*, *Gastrodia elata*, *Keteleeria pubescens*, *Phoebe zhennan*, *Zelkova serrata*, *Torreya grandis*, etc. 3) rare and endangered wild animals and their habitats under national protection, represented by *Moschus berezovskii*, *Lutra lutra*, *Manis pentadactyla*, *Viverricula indica*, *Naemorhedus sumatraensi*, *Macaca mulatta*, etc.

**Yangxi:** Yangxi nature reserve is located in Yinjiang County, with a total area of 21,871 hm<sup>2</sup>, and is facing ecological degradation like biodiversity loss, soil erosion, vegetation reduction, environmental pollution, and karst rocky desertification. The karst type of Yangxi nature reserve is limestone karst. There are three main types of protected objects in the Yangxi nature reserve: 1) mid-subtropical evergreen broad-leaf forest and evergreen and deciduous broad-leaved mixed forest; 2) rare and endangered plants and their habitats under national protection, represented by *Taxus wallichiana* var. *maire*, *Bretschneidera sinensis*, *Cinnamomum platyphyllum*, etc. 3) rare and endangered wild animals and their habitats under national protection, represented by *Rhinopithecus brelichi*, *Moschus berezovskii*, *Syrmaticus ellioti*, etc.

**Mayanghe:** Mayanghe nature reserve is located in Yanhe County, with a total area of 31,113 hm<sup>2</sup>, and is facing ecological degradation like biodiversity loss, vegetation reduction, soil erosion, environmental pollution, and karst rocky desertification. The karst type of Mayanghe nature reserve is dolomite karst. There are two main types of protected objects in the Mayanghe nature reserve: 1) mid-subtropical evergreen broad-leaf forest; 2) rare and endangered wild animals and their habitats under national protection, represented by *Trachypithecus francoisi*.

**Bailidujuan:** Bailidujuan nature reserve is located at the border of Qianxi County and Dafang County, with a total area of 10,982 hm<sup>2</sup>, and is facing ecological degradation like biodiversity loss, vegetation reduction, soil erosion, environmental pollution, and karst rocky desertification. The karst type of Bailidujuan nature reserve is limestone karst. There are three main types of protected objects in the Bailidujuan nature reserve: 1) Azalea forest ecosystem; 2) rare and endangered plants and their habitats under national protection, represented by *Davidia involucrata*, *Taxus chinensis*, *Emmenopterys henryi*, *Cercidiphyllum japonicum*, *Magnolia officinalis*, *Camptotheca acuminata*, etc. 3) rare and endangered wild animals and their habitats under national

protection, represented by *Tylototriton asperrimus*, *Tylototriton kweichowensis*, *Manis pentadactyla*, *Prionailurus bengalensis*, *Viverricula indica taivana*, *Chrysolophus pictus*, *Chrysolophus amherstiae*, *Syrmaticus reevesii*, etc.

**Gongtong:** Gongtong nature reserve is located in Nayong County, with a total area of 11,398 hm<sup>2</sup>, and is facing ecological degradation like vegetation reduction, biodiversity loss, soil erosion, environmental pollution, and karst rocky desertification. The karst type of Gongtong nature reserve is limestone karst. The main type of protected objects in the Gongtong nature reserve is rare and endangered plants and their habitats under national protection, represented by *Davidia involucrata* var. *vilmoriniana*, *Isoetes yunguiensis*, *Dipentodon sinicus*, etc.

### **Non-karst nature reserves**

**Suoluo:** Suoluo nature reserve is in Chishui City, with a total area of 13,300 hm<sup>2</sup>, and is facing ecological degradation like biodiversity loss, soil erosion, vegetation reduction, and environmental pollution. There are three main types of protected objects in the Suoluo nature reserve: 1) mid-subtropical evergreen broad-leaf forest; 2) rare and endangered plants and their habitats under national protection, represented by *Alsophila spinulosa*, *Camellia luteoflora*, *Taxus wallichiana* var. *chinensis*, *Bretschneidera sinensis*, etc. 3) rare and endangered wild animals and their habitats under national protection, represented by *Neofelis nebulosa brachyuran*, *Moschus berezovskii*, etc.

**Xishui:** Xishui nature reserve is located in Zunyi City, with a total area of 51,911 hm<sup>2</sup>, and is facing ecological degradation like biodiversity loss, soil erosion, vegetation reduction, and environmental pollution. There are three main types of protected objects in the Xishui nature reserve: 1) mid-subtropical evergreen broad-leaf forest; 2) rare and endangered plants and their habitats under national protection, represented by *Taxus wallichiana* var. *chinensis*, *Taxus wallichiana* var. *mairei*, *Bretschneidera sinensis*, etc. 3) rare and endangered wild animals and their habitats under national protection, represented by *Panthera pardus*, *Neofelis nebulosa brachyura*, *Moschus berezovskii*, etc.

**Fanjingshan:** Fanjingshan nature reserve is located at the border of Jiangkou County, Yinjiang County, and Songtao County, with a total area of 43,411 hm<sup>2</sup>, and is facing ecological degradation like biodiversity loss, soil erosion, vegetation reduction, and environmental pollution. There are three main types of protected objects in the Fanjingshan nature reserve: 1) primary forest ecosystems; 2) rare and endangered plants and their habitats under national protection, represented by *Davidia involucrata*, *Abies fanjiangshanensis*, *Taxus wallichiana* var. *mairei*, *Taxus chinensis*, etc. 3) rare and endangered wild animals and their habitats under national protection, represented by *Rhinopithecus brelichi*, *Panthera pardus*, *Neofelis nebulosa*, *Syrmaticus reevesii*, etc.

**Gedong:** Gedong nature reserve is located in Jianhe County, with a total area of 3,200 hm<sup>2</sup>, and is facing ecological degradation like biodiversity loss, soil erosion, vegetation reduction, and environmental pollution. There are two main types of protected objects in the Gedong nature reserve: 1) mid-subtropical evergreen

broad-leaf forest; 2) geological heritage and paleontological fossil.

**Leigongshan:** Leigongshan nature reserve is located in Leishan County, with a total area of 47,300 hm<sup>2</sup>, and is facing ecological degradation like biodiversity loss, soil erosion, vegetation reduction, and environmental pollution. There are three main types of protected objects in the Leigongshan nature reserve: 1) mid-subtropical forest ecosystems; 2) rare and endangered plants and their habitats under national protection, represented by *Taiwania cryptomerioides*, *Taxus wallichiana* var. *chinensis*, *Taxus wallichiana* var. *mairei*, *Bretschneidera sinensis*, etc. 3) rare and endangered wild animals and their habitats under national protection, represented by *Neofelis nebulosa brachyura*, *Codonopsis javanica* subsp. *japonica*, *Moschus berezovskii*, etc.
